# Supplementary material for: Lactate-Induced HBEGF Shedding and EGFR Activation: Paving the Way to a New Anticancer Therapeutic Opportunity
Source: Preprints.org preprint supplement (doi:10.20944/preprints202407.1510.v1), 2024-07-19

## Wound healing assay performed on HT-29 cultures

No significant differences were observed among the differently treated samples

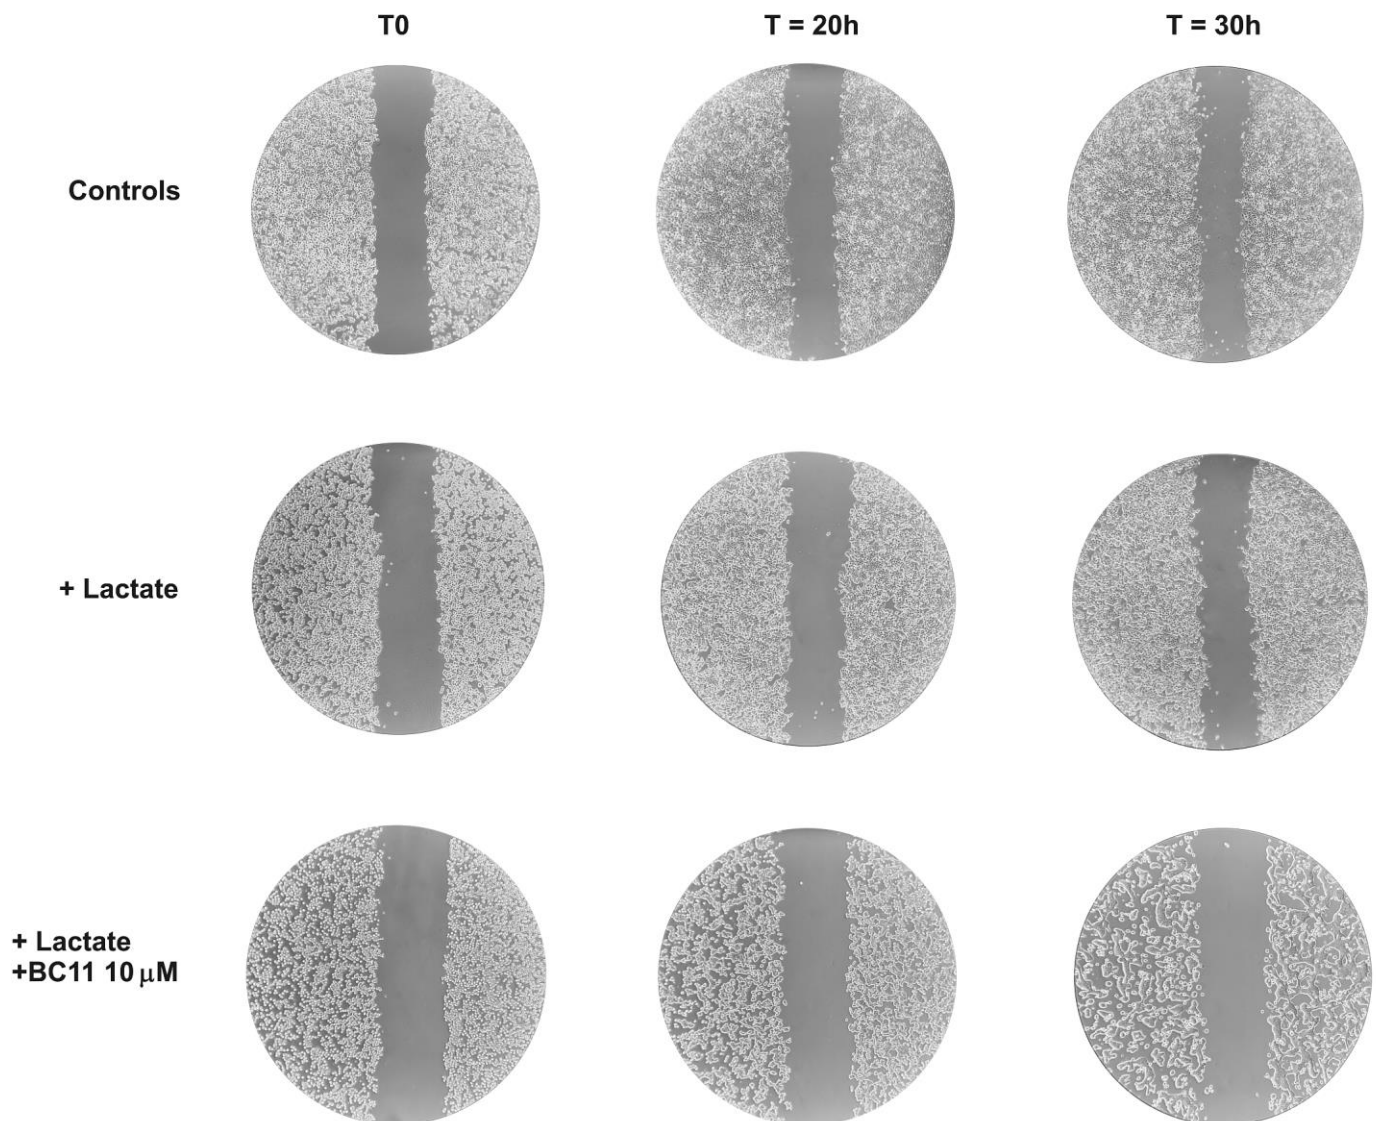

Supplement: Supplementary file 1 [file supplementary]
