# Supplementary material for: Lactate-Induced HBEGF Shedding and EGFR Activation: Paving the Way to a New Anticancer Therapeutic Opportunity
Source: Preprints.org preprint supplement (doi:10.20944/preprints202407.1510.v1), 2024-07-19
Supplement: Supplementary file 3 [file supplementary]

## File S1

### Assay of lactate production in MDA-MB-231 cells

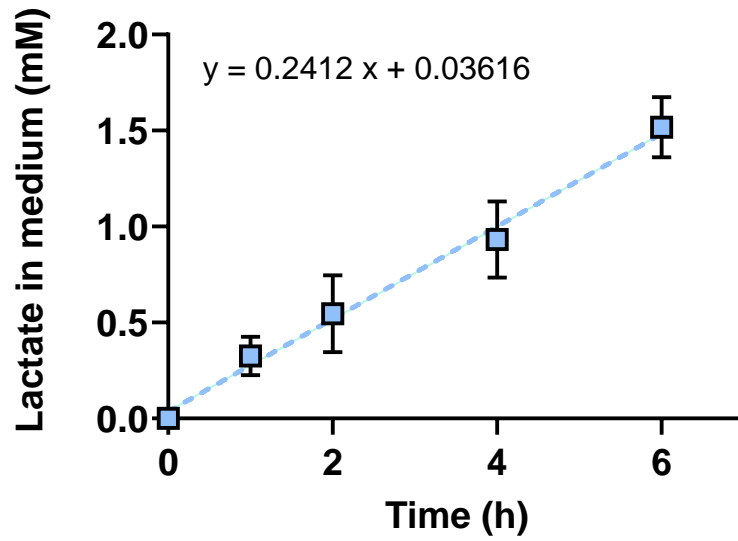

Cells were maintained at a density of  $5 \times 10^5 / 10 \text{ cm}^2$ . Released lactate was assessed by using the method described by Rossi V., et al. In *Cancers* **2023**, 15, 3728. The graph shows the millimolar lactate concentrations released in medium at different time intervals.
