# Supplementary figures and images for: Lactate-Induced HBEGF Shedding and EGFR Activation: Paving the Way to a New Anticancer Therapeutic Opportunity
Source: Preprints.org preprint supplement (doi:10.20944/preprints202407.1510.v1), 2024-07-19

# Clonogenic assay performed on HT-29 cultures

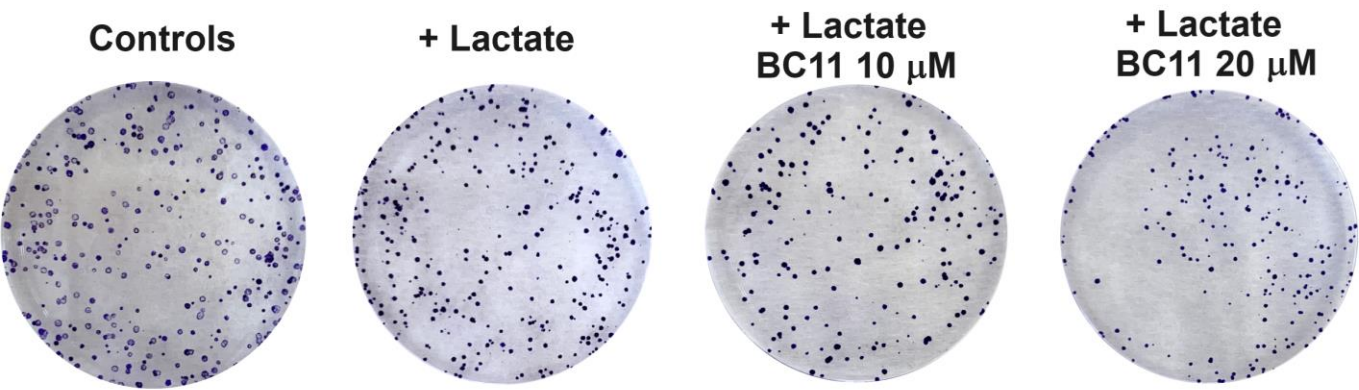

Colorimetric evaluation of colonies

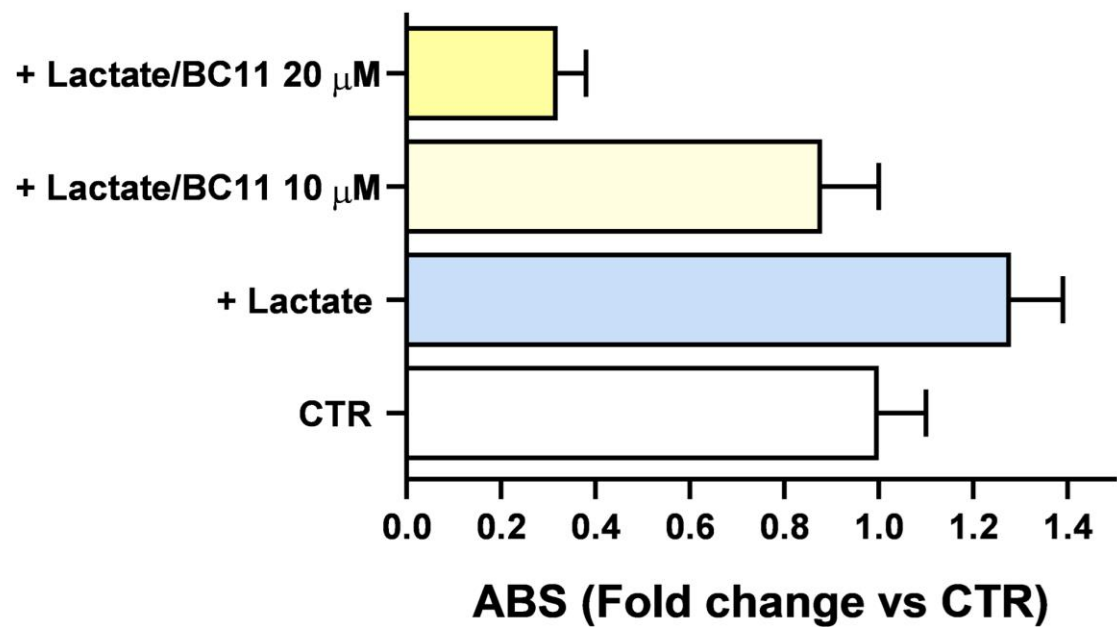

Supplement: Supplementary file 2 [file supplementary]
